# Supplementary figures and images for: Bixin protects against particle-induced long-term lung injury in an NRF2-dependent manner
Source: Royal Society of Chemistry journal article supplement (doi:10.1039/c7tx00304h), 2018-01-01

S1

A

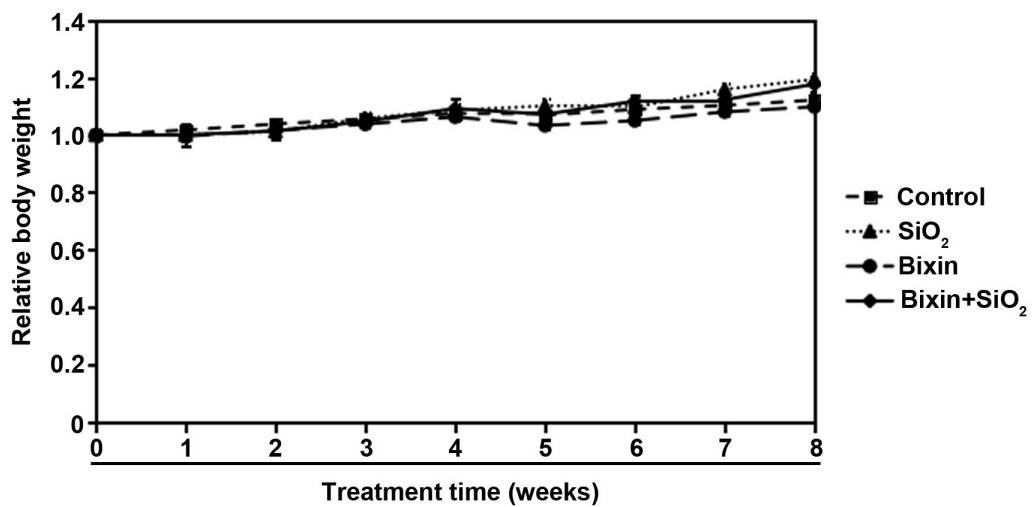

B

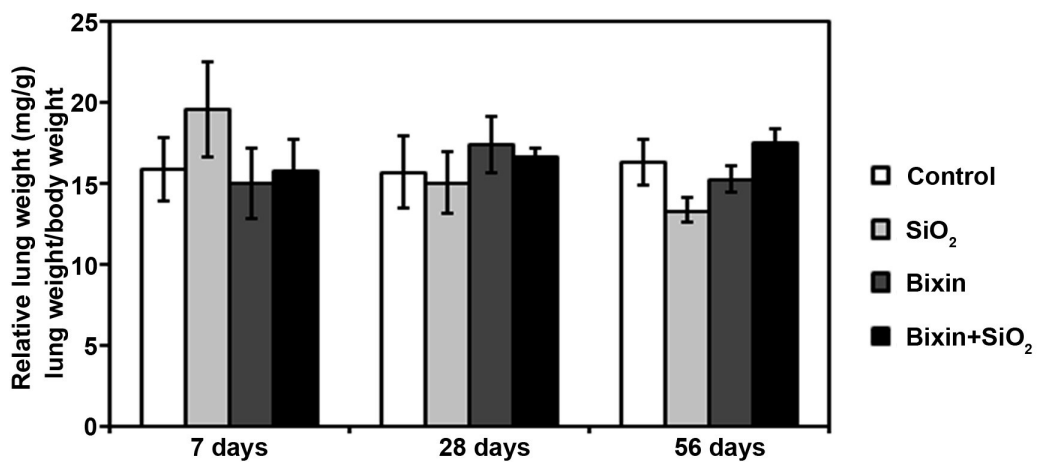

Supplement: c7tx00304h2.pdf [file c7tx00304h2.pdf]
